# Supplementary material for: Modulation of cell-cycle dynamics is required to regulate the number of cerebellar GABAergic interneurons and their rhythm of maturation
Source: Oxford University Press journal article supplement (doi:10.1242/dev.064378), 2011-07-20
Supplement: dev064378tables2.pdf [file dev064378tables2.pdf]

**Table S2. Summary of homo/heterochronic transplantation experiments carried out with wild-type and *Ccnd2*<sup>-/-</sup> donor cells and recipient mice**

|                                                                                         | Wild-type host                                                               | <i>Ccnd2</i> <sup>-/-</sup> host     |
|-----------------------------------------------------------------------------------------|------------------------------------------------------------------------------|--------------------------------------|
| Wild-type donor                                                                         | P7 to P1 (281/3)<br>P7 to P7 (187/9)<br>E18 to P2 (27/2)<br>P2 to P4 (576/3) | P7 to P1 (242/4)<br>P7 to P7 (121/3) |
| <i>Ccnd2</i> <sup>-/-</sup> donor                                                       | E18 to P2 (16/3)<br>P2 to P4 (230/13)<br>P7 to P7 (50/5)                     |                                      |
| Numbers in parentheses indicate the number of engrafted cells/number of examined cases. |                                                                              |                                      |
